# Supplementary material for: Assessment of Tobacco Habits, Attitudes, and Education Among Medical Students in the United States and Italy: A Cross-sectional Survey
Source: PubMed Central journal article supplement — J Prev Med Public Health. 2017 Apr 14;50(3):177–87. doi: 10.3961/jpmph.15.061 (PMC5495685; doi:10.3961/jpmph.15.061), 2017-04-14
Supplement: jpmph-50-3-177-suppl.pdf [file jpmph-50-3-177-suppl.pdf]

**Supplemental Table 1.** iPARTY questionnaire (in English), which was administered in an anonymous and secure electronic survey format to medical students<sup>1</sup>**Part 1: Demographics**

1. Age
2. Gender
  - a. Male
  - b. Female
3. Medical School
  - a. Brown University
  - b. Bologna University
4. Year of Training
  - a. Brown University
    - i. 1
    - ii. 2
    - iii. 3
    - iv. 4
  - b. Bologna University
    - i. 1
    - ii. 2
    - iii. 3
    - iv. 4
    - v. 5
    - vi. 6

**Part 2: Smoking habits**

5. Have you smoked cigarettes at least one day during the 7 days prior to the survey?
  - a. Yes
  - b. No
6. If yes, how many cigarettes per day in an average day?
  - a. <1
  - b. 1-5
  - c. 6-10
  - d. 11-15
  - e. 16-20
  - f. >20
7. During a routine H&P, do you always ask about smoking habits?
  - a. Yes
  - b. No
8. If the patient smokes, do you discuss cessation counselling or treatment options on a routine basis?
  - a. Yes
  - b. No
9. How many cigarettes smoked per day make you concerned about a male patient's health?
  - a. 1-5
  - b. 6-10
  - c. 11-15
  - d. 16-20
  - e. >20
    - i. About a female patient's health?
      1. 1-5
      2. 6-10
      3. 11-15
      4. 16-20
      5. >20
10. Are you aware of your institutions smoking policies?
  - a. Yes
  - b. No
    - i. If yes, do you follow these policies all of the times?
      1. Yes
      2. No
11. Do you think that cigarette usage by physicians could affect their approach to patients smoking habit?
  - a. Yes
  - b. No
12. If you smoke, do you believe that your cigarette usage has ever influenced your approach to patients who smoke within the past year?
  - a. Yes
  - b. No
13. How many cigarettes smoked by physicians do you think it would take to influence their patients opinion about their professionalism?
  - a. 1-5
  - b. 6-10
  - c. 11-15
  - d. 16-20
  - e. >20
  - f. Patients opinion will never be influenced

(Continued to the next page)

Supplemental Table 1. Continued from the previous page

**Part 3: Drinking habits**

14. How many servings of alcohol do you have in a typical week?
- 0
  - 1-3
  - 4-7
  - 8-11
  - 12-14
  - 15-18
  - > 18
15. In the past month have you consumed 5 or more drinks (men) or 4 or more drinks (women) in a night?
- Yes
  - No
16. During a routine H&P, do you always ask about alcohol drinking habits?
- Yes
  - No
17. If the patient has drinking problems, do you discuss cessation counselling or treatment options on a routine basis?
- Yes
  - No
18. How many servings of alcohol consumed per week make you concerned about a male patient's health?
- 1-3
  - 4-7
  - 8-11
  - 12-14
  - 15-18
  - > 18
19. How many servings of alcohol consumed per week make you concerned about a female patient's health?
- 1-3
  - 4-7
  - 8-11
  - 12-14
  - 15-18
  - > 18
20. Are you aware of your institutions alcohol policies?
- Yes
  - No
- i. If yes, do you follow these policies all of the times?
- Yes
  - No
21. Do you think that alcohol usage by physicians could affect their approach to their patient alcohol habits?
- Yes
  - No
22. If you drink alcohol, do you believe that your alcohol usage has ever influenced your approach to patients who abuse alcohol?
- Yes
  - No
23. How many servings of alcohol consumed by physicians do you think it would take to influence their patients opinion about their professionalism?
- 1-3 per week
  - 4-7 per week
  - 8-11 per week
  - 12-14 per week
  - 15-18 per week
  - > 18 per week
  - 5 or more drinks (men) or 4 or more drinks (women) in a night
  - Patients opinion will never be influenced

**Part 4: Education**

24. During your medical school training, were you taught in any of your courses about the dangers of smoking?
- Yes
  - No
25. During your medical school training, have you ever received any formal training in smoking cessation approaches to use with patients?
- Yes
  - No
26. Should medical students get specific training on smoking cessation?
- Yes
  - No
27. During your medical school training, were you taught in any of our courses about the dangers of drinking?
- Yes
  - No
28. During your medical school training, have you ever received any formal training in alcohol cessation approaches to use with patients?
- Yes
  - No
29. Should medical students get specific training on alcohol cessation?
- Yes
  - No

iPARTY, International Professional Assessment of Drinking and Tobacco Perceptions among Young.

<sup>1</sup>Alcohol-related questions were not utilized in the present study.
